# Supplementary material for: Kidney transplantation from small pediatric donors may be feasible to those who developed chronic refractory dialysis hypotension: a single-center experience
Source: PubMed Central journal article supplement — Ann Transl Med. 2020 Jun;8(11):683. doi: 10.21037/atm-20-304 (PMC7327316; doi:10.21037/atm-20-304), 2020-06
Supplement: atm-08-11-683-dss.pdf [file atm-08-11-683-dss.pdf]

## Data Sharing Statement

|                     |                                                                                                                                                    |                                                                                                   |
|---------------------|----------------------------------------------------------------------------------------------------------------------------------------------------|---------------------------------------------------------------------------------------------------|
| <b>Article Info</b> | <a href="http://dx.doi.org/10.21037/atm-20-304">http://dx.doi.org/10.21037/atm-20-304</a>                                                          |                                                                                                   |
| <b>Item</b>         | <b>Question</b>                                                                                                                                    | <b>Authors' Response</b><br>(place "-" if not applicable)                                         |
| 1                   | Would you like to share data collected for your study to others?                                                                                   | Yes                                                                                               |
| 2                   | If not, would you like to share the reason for your decision?                                                                                      | -                                                                                                 |
| 3                   | What data in particular will be shared?                                                                                                            | Research methods and results                                                                      |
| 4                   | Any other documents will be share? Such as study protocol, statistical analysis plan, informed consent form, clinical study report, analytic code. | Yes                                                                                               |
| 5                   | When will data availability begin?                                                                                                                 | After publication of this article                                                                 |
| 6                   | When will data availability end?                                                                                                                   | One year                                                                                          |
| 7                   | To whom will you share the data?                                                                                                                   | Researchers in the kidney transplantation field                                                   |
| 8                   | For what type of analysis or purpose?                                                                                                              | To solve the issue of those chronic refractory dialysis hypotension patients in clinical practice |
| 9                   | How or where can the data/documents be obtained?                                                                                                   | The data are available from the corresponding author upon request                                 |
| 10                  | Any other restrictions?                                                                                                                            | No                                                                                                |
